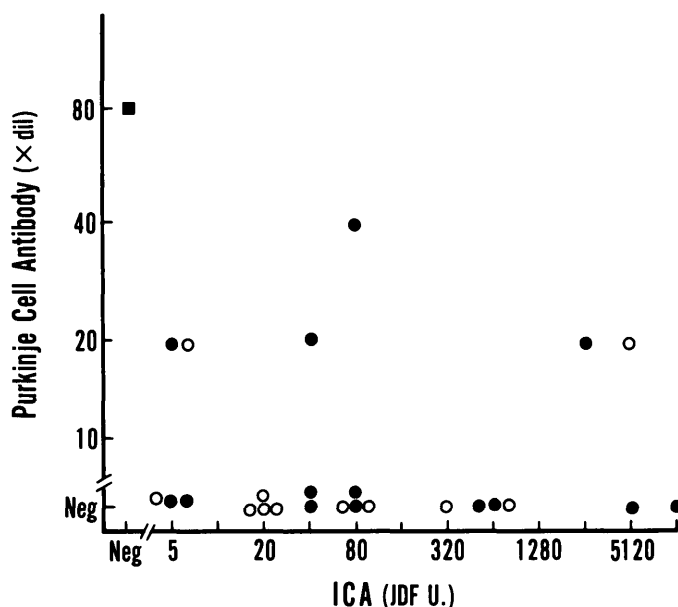

**Figure 1**—Correlation between the titer of ICA and the titer of autoantibodies to glutamic acid decarboxylase-containing Purkinje cells in 14 patients with ICA<sup>+</sup> IDDM (●), 11 patients with ICA<sup>+</sup> NIDDM (○), and 1 patient with stiff-man syndrome (■).

antibody and ICA did not show any positive correlation (Fig. 1).

In a previous report (2), anti-GAD antibodies (the 64K antibody) in IDDM patients, which reacted with GABA-ergic neurons, rarely recognized denatured GAD on Western blotting analysis. In this study, an immunohistochemical approach that used unfixed and undenatured specimens was adopted to examine the reactivity of anti-GAD antibody to its target antigens. No association between ICA and Purkinje cell autoantibody was observed in terms of positivity and titers in IDDM and stiff-man syndrome, suggesting that the two antibodies are distinct from each other.

TETSURO KOBAYASHI, MD  
KOJI NAKANISHI, MD  
TOSHIO MURASE, MD  
KINORI KOSAKA, MD

FROM THE DEPARTMENT OF ENDOCRINOLOGY AND METABOLISM, TORANOMON HOSPITAL AND OKINAKA MEMORIAL INSTITUTE FOR MEDICAL RE-

SEARCH, TORANOMON, MINATO-KU, TOKYO, JAPAN.

ADDRESS CORRESPONDENCE AND REPRINT REQUESTS TO TETSURO KOBAYASHI, MD, DEPARTMENT OF ENDOCRINOLOGY AND METABOLISM, TORANOMON HOSPITAL, 2-2-2 TORANOMON, MINATO-KU, TOKYO 105, JAPAN.

IDDM, INSULIN-DEPENDENT DIABETES MELLITUS; GAD, GLUTAMIC ACID DECARBOXYLASE; ICA, ISLET CELL CYTOPLASMIC ANTIBODIES.

.....  
**Acknowledgments**—Supported in part by a grant from the Ministry of Health and Welfare of Japan.

.....  
**References**

- Solimena M, Folli F, Aparisi R, Pozza G, De Camilli P: Autoantibodies to GABA-ergic neurons and pancreatic beta cells in stiff-man syndrome. *N Engl J Med* 322: 1555–60, 1990
- Baekkeskov S, Aanstoot HJ, Christgau S, Rietz A, Solimena M, Cascalho M, Folli F, Richter-Olesen H, De-Camilli P: Identification of the 64K autoantigen in insulin-dependent diabetes as the GABA-

synthesizing enzyme glutamic acid decarboxylase. *Nature* 347:151–56, 1990

- Bottazzo, GF:  $\beta$ -cell damage in diabetic insulinitis: are we approaching a solution? *Diabetologia* 26:241–49, 1984
- Kobayashi T, Itoh T, Kosaka K, Sato K, Tsuji K: Time course of islet cell antibodies and  $\beta$ -cell function in non-insulin-dependent stage of type 1 diabetes. *Diabetes* 36:510–17, 1987
- Kobayashi T, Sugimoto T, Itoh T, Kosaka K, Tanaka T, Suwa S, Sato K, Tsuji K: The prevalence of islet cell antibodies in Japanese insulin-dependent and non-insulin-dependent diabetic patients studied by indirect immunofluorescence and by a new method. *Diabetes* 35:335–40, 1986

## Glycemic Index Versus Glycemic Response

Nonsynonymous terms

Rasmussen et al. (1) found that most of the variation of glycemic responses in NIDDM subjects is attributable to between-subject variation. It was gratifying that the CVs of blood glucose responses within- and between-subjects that they observed in NIDDM patients treated with diet and oral agents—19 and 33%—respectively, were similar to those we found in 1985, for NIDDM patients on diet and oral agents—16 and 34%, respectively (2). These values also are similar to those for within- and between-subject variation of glycemic responses we found in 1985 for NIDDM patients on insulin—15 and 23% (2), and in 1989 for a mixed group of NIDDM patients (7 on insulin and 4 on diet or oral agents)—16 and 25% (3). Rasmussen et al. then expressed surprise about our report in 1990 that the within-subject variation of the glycemic index was much greater than that between subjects, with SDs of 16 and 6, respectively (4). However, far from being surprising,

these results are to be expected. It is important not to confuse the terms glycemic index and glycemic response; they mean different things and have different mathematical and statistical properties. The glycemic index standardizes glycemic response areas to each individual's response to a standard food, thus correcting for between-subject variation. The figure, drawn from our 1990 data, shows the percentage of the total variance of the glycemic responses and glycemic index values attributable to the order of testing, the different foods (bread, rice, and spaghetti), order-food interaction,<sup>2</sup> subject (between-subject variation), and error (within-subject variation) (4). Most of the variation of the blood glucose response areas was attributable to between-subject variation. However, expressing the results as glycemic indexes, the proportion of the total variance attributable to between-subject variability is reduced markedly. This is the purpose of the glycemic index.

It also should be pointed out that expressing results as the glycemic index reduces total variability by reducing only between-subject variation without affecting within-subject or between-food variation (Table 1). The between-subject variation of glycemic responses in this study is large because both IDDM and NIDDM subjects were studied and the subjects were selected to be dissimilar so

**Table 1—Sources of variation of glycemic response areas and glycemic index values expressed as SDs and CVs**

| SOURCE OF VARIANCE | GLYCEMIC RESPONSE AREA |        | GLYCEMIC INDEX |        |
|--------------------|------------------------|--------|----------------|--------|
|                    | SD                     | CV (%) | SD             | CV (%) |
| FOOD               | 262                    | 31     | 22.9           | 30     |
| WITHIN-SUBJECT     | 210                    | 25     | 15.9           | 21     |
| BETWEEN-SUBJECT    | 408                    | 49     | 5.8            | 8      |

Data from reference 4.

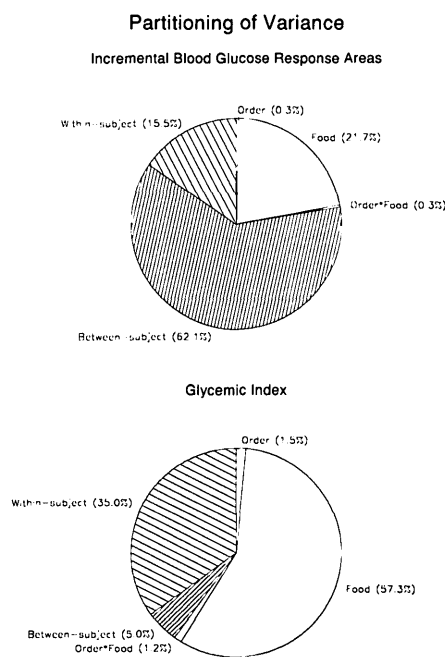

**FIG. 1—Sources of variance of glycemic responses and glycemic index values expressed as percentage of total variance. Data from (4).**

as to increase between-subject variation (4).

THOMAS M.S. WOLEVER, BM, BCH, PHD

FROM THE DEPARTMENT OF NUTRITIONAL SCIENCES AND THE CLINICAL NUTRITION AND RISK FACTOR MODIFICATION CENTRE, ST. MICHAEL'S HOSPITAL, UNIVERSITY OF TORONTO, TORONTO, ONTARIO, CANADA.

ADDRESS CORRESPONDENCE TO DR. T.M.S. WOLEVER, DEPARTMENT OF NUTRITIONAL SCIENCES, UNIVERSITY OF TORONTO, TORONTO, ONTARIO, CANADA M5S 1A8.

NIDDM, NON-INSULIN-DEPENDENT DIABETES MELLITUS; CV, COEFFICIENT OF VARIATION; IDDM, INSULIN-DEPENDENT DIABETES MELLITUS.

**References**

1. Rasmussen OW, Gregersen S, Dorup J, Hermansen K: Day-to-day variation of blood glucose and insulin responses in NIDDM subjects after starch-rich meal. *Diabetes Care* 15:522–24, 1992
2. Wolever TMS, Nuttall FQ, Lee R, Wong

GS, Josse RG, Csima A, Jenkins DJA: Prediction of the relative blood glucose response of mixed meals using the white bread glycemic index. *Diabetes Care* 8:418–28, 1985

3. Wolever TMS, Csima A, Jenkins DJA, Wong GS, Josse RG: The glycemic index: variation between subjects and predictive difference. *J Am Coll Nutr* 8:235–47, 1989
4. Wolever TMS, Jenkins DJA, Vuksan V, Josse RG, Wong GS, Jenkins AL: Glycemic index of foods in individual subjects. *Diabetes Care* 13:126–32, 1990

**Hazard of Glucagon Test in Diabetic Patients**

Hypertensive crisis in asymptomatic pheochromocytoma

Plasma C-peptide response to glucagon has been widely applied for a measure of insulin secretory capacity or classification of insulin-requiring or non-insulin-requiring diabetic patients (1,2). On the other hand, glucagon has been used for the diagnosis of pheochromocytoma as provocative test, which can precipitate a severe pressor response and even a hypertensive crisis. Patients with pheochromocytoma are often associated with diabetes mellitus, indicating the danger of glucagon test in such cases. To the best of our knowledge, no such case has been reported. We present a case of asymptomatic pheochromocytoma, which was incidentally diagnosed because of the occurrence of hypertensive crisis during glucagon test for evaluation of  $\beta$ -cell function.

A 50-yr-old Japanese woman (1.64 m, 57 kg, body mass index 21.2 kg/m<sup>2</sup>) was referred to our hospital in December 1990 for uncontrolled diabetes mellitus. She had been taking hypoglycemic agents for 6 yr and had no history of hypertension. On admission,

Downloaded from http://ada.silverchair.com/article-pdf/15/10/1436/441031/15-10-1436.pdf by guest on 18 April 2024
